# Supplementary material for: Exploring the antioxidant potential of chalcogen-indolizines throughout in vitro assays
Source: PeerJ. 2024 Mar 15;12:e17074. doi: 10.7717/peerj.17074 (PMC10946399; doi:10.7717/peerj.17074)

**Supplementary Material**

**Exploring the Antioxidant Potential of Chalcogen-indolizines throughout *in vitro* assays**

Cleisson S. Garcia1, Marcia J. da Rocha1, Marcelo H. Presa1, Camila S. Pires1, Evelyn M. Besckow1, Filipe Penteado2, Caroline S. Gomes3, Eder J. Lenardão3, Cristiani F. Bortolatto1 and César A. Brüning1

1 Laboratory of Biochemistry and Molecular Neuropharmacology (LABIONEM), Graduate Program in Biochemistry and Bioprospecting (PPGBBio), Chemical, Pharmaceutical and Food Sciences Center (CCQFA), Federal University of Pelotas (UFPel), P.O. Box, 354, 96010-900, Pelotas, RS, Brazil.

2 Department of Chemistry, Federal University of Santa Maria (UFSM), Av. Roraima, Building 18, 97105-340, Santa Maria, RS, Brazil.

3 Laboratory of Clean Organic Synthesis (LASOL), Chemical, Pharmaceutical and Food Sciences Center (CCQFA), Federal University of Pelotas (UFPel), P.O. Box, 354, 96010-900, Pelotas, RS, Brazil.

2-phenyl-1-(phenylthio)indolizine (**SIN-1**)

1H NMR (CDCl3, 400 MHz) *δ* (ppm) 7.86 (d, *J* = 6.9 Hz, 1H); 7.58 – 7.51 (m, 2H); 7.51 – 7.41 (m, 2H); 7.29 – 7.21 (m, 2H); 7.20 – 7.14 (m, 1H); 7.08 – 7.00 (m, 2H); 6.96 – 6.88 (m, 3H); 6.71 (ddd, *J* = 9.0, 6.6, 0.8 Hz, 1H); 6.54 – 6.46 (m, 1H). 13C NMR (CDCl3, 100 MHz) *δ* (ppm) 140.6, 137.4, 134.2, 133.2, 128.7, 128.3, 127.0, 125.5, 125.1, 124.4, 119.7, 118.0, 111.9, 111.7, 94.6.

2-(4-chlorophenyl)-1-(phenylthio)indolizine (**SIN-2**)

1H NMR (CDCl3, 400 MHz) *δ* (ppm) 7.87 (d, *J* = 6.8 Hz, 1H); 7.53 – 7.44 (m, 4H); 7.21 (d, *J* = 8.5 Hz, 2H); 7.09 – 7.02 (m, 2H); 6.97 – 6.86 (m, 3H); 6.77 – 6.70 (m, 1H); 6.57 – 6.49 (m, 1H). 13C NMR (CDCl3, 100 MHz) *δ* (ppm) 140.3, 137.6, 133.0, 132.6, 131.9, 129.9, 128.8, 128.5, 125.5, 125.1, 124.5, 120.0, 118.0, 112.1, 111.7, 94.6.

1-(phenylthio)-2-(p-tolyl)indolizine (**SIN-3**)

1H NMR (CDCl3, 400 MHz) *δ* (ppm) 7.86 (d, *J* = 6.7 Hz, 1H); 7.52 – 7.38 (m, 4H); 7.10 – 7.00 (m, 4H); 6.96 – 6.87 (m, 3H); 6.74 – 6.67 (m, 1H); 6.54 – 6.45 (m, 1H); 2.25 (s, 3H). 13C NMR (CDCl3, 100 MHz) *δ* (ppm) 140.7, 137.4, 136.7, 133.3, 131.2, 129.1, 128.7, 128.5, 125.5, 125.1, 124.3, 119.6, 117.9, 111.8, 111.6, 94.5, 21.1.

2-(4-chlorophenyl)-1-((4-fluorophenyl)thio)indolizine (**SIN-4**)

1H NMR (CDCl3, 400 MHz) *δ* (ppm) 7.89 (d, *J* = 6.9 Hz, 1H); 7.53 – 7.43 (m, 4H); 7.24 (d, *J* = 8.5 Hz, 2H); 6.89 – 6.81 (m, 2H);6.80 – 6.72 (m, 3H); 6.58 – 6.52 (m, 1H). 13C NMR (CDCl3, 100 MHz) *δ* (ppm) 160.7 (d, *J* = 243.7 Hz), 137.5, 135.2 (d, *J* = 2.9 Hz), 133.1, 132.6, 131.8, 129.9, 128.5, 126.9 (d, *J* = 7.7 Hz), 125.6, 120.1, 117.9, 115.8 (d, *J* = 22.1 Hz), 112.1, 111.8, 95.1.

2-(4-chlorophenyl)-1-((4-methoxyphenyl)thio)indolizine (**SIN-5**)

1H NMR (CDCl3, 400 MHz) *δ* (ppm) 7.85 (d, *J* = 6.9 Hz, 1H); 7.56 – 7.47 (m, 3H); 7.43 (s, 1H); 7.23 (d, *J* = 8.5 Hz, 2H); 6.87 (d, *J* = 8.8 Hz, 2H); 6.78 – 6.71 (m, 1H); 6.63 (d, *J* = 8.8 Hz, 2H); 6.55 – 6.49 (m, 1H); 3.63 (s, 3H). 13C NMR (CDCl3, 100 MHz) *δ* (ppm) 157.5, 137.4, 132.9, 132.8, 131.7, 130.9, 129.9, 128.5, 127.2, 125.5, 119.8, 118.0, 114.5, 112.0, 111.5, 96.2, 55.3.

2-(4-chlorophenyl)-1-(phenylselanyl)indolizine (**ClSeI**)

1H NMR (CDCl3, 400 MHz) *δ* (ppm) 7.92 (d, *J* = 6.9 Hz, 1H); 7.59 (d, *J* = 9.0 Hz, 1H); 7.54-7.47 (m, 3H); 7.29 (d, *J* = 8.4 Hz, 2H); 7.13-7.01 (m, 5H); 6.83-6.75 (m, 1H); 6.61-6.54f (m, 1H). 13C NMR (CDCl3, 100 MHz) *δ* (ppm) 137.7, 135.0, 133.3, 132.9, 132.4, 130.2, 129.0, 128.3, 127.8, 125.4, 119.8, 119.0, 111.9, 91.5.

1-(phenylselanyl)-2-(p-tolyl)indolizine (**MeSeI**)

1H NMR (CDCl3, 400 MHz) *δ* (ppm) 7.86 (d, *J* = 6.7 Hz, 1H); 7.52 – 7.38 (m, 4H); 7.10 – 7.00 (m, 4H); 6.96 – 6.87 (m, 3H); 6.74 – 6.67 (m, 1H); 6.54 – 6.45 (m, 1H); 2.25 (s, 3H). 13C NMR (CDCl3, 100 MHz) *δ* (ppm) 140.7, 137.4, 136.7, 133.3, 131.2, 129.1, 128.7, 128.5, 125.5, 125.1, 124.3, 119.6, 117.9, 111.8, 111.6, 94.5, 21.1.

2-phenyl-1-(phenylselanyl)indolizine (**SeI**)

1H NMR (CDCl3, 400 MHz) *δ* (ppm) 7.86 (d, *J* = 6.9 Hz, 1H); 7.56 – 7.54 (m, 2H); 7.49 – 7.47 (m, 2H); 7.27 – 7.23 (m, 2H); 7.19 – 7.15 (m, 1H); 7.07 – 7.03 (m, 2H); 6.94 – 6.91 (m, 3H); 6.72 (ddd, *J* = 9.0, 6.6, 0.8 Hz, 1H); 6.51 (td, *J* = 6.9, 1.0 Hz, 1H). 13C NMR (CDCl3, 100 MHz) *δ* (ppm) 137.6, 135.3, 134.8, 133.7, 129.1, 128.9, 128.2, 127.9, 127.0, 125.4, 125.2, 119.6, 119.1, 112.0, 111.8, 91.6.


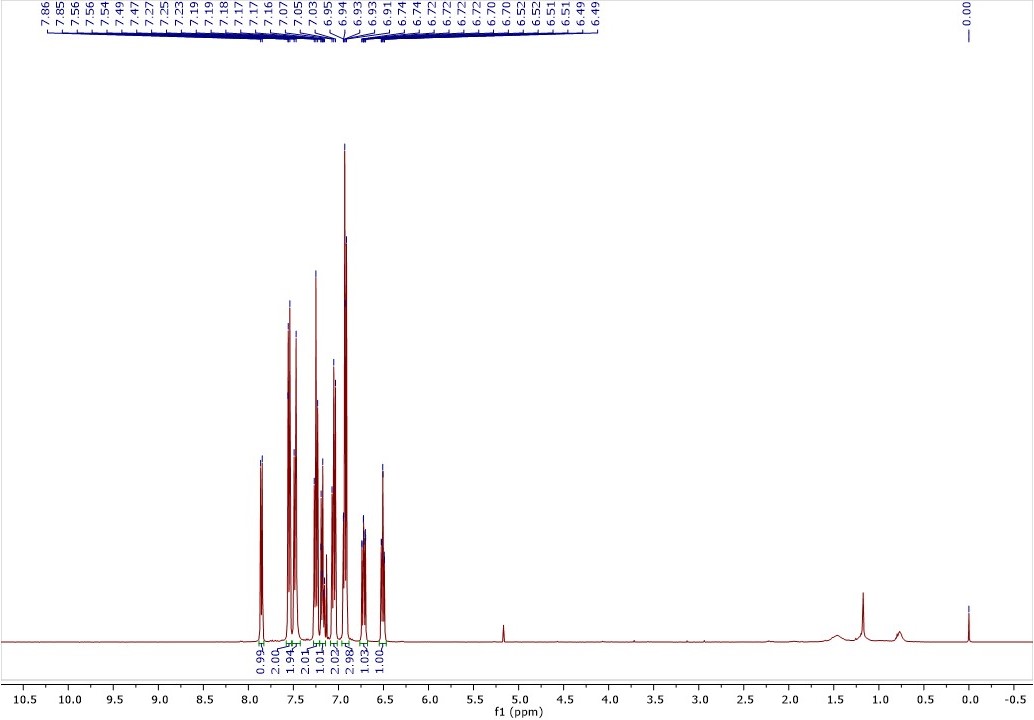


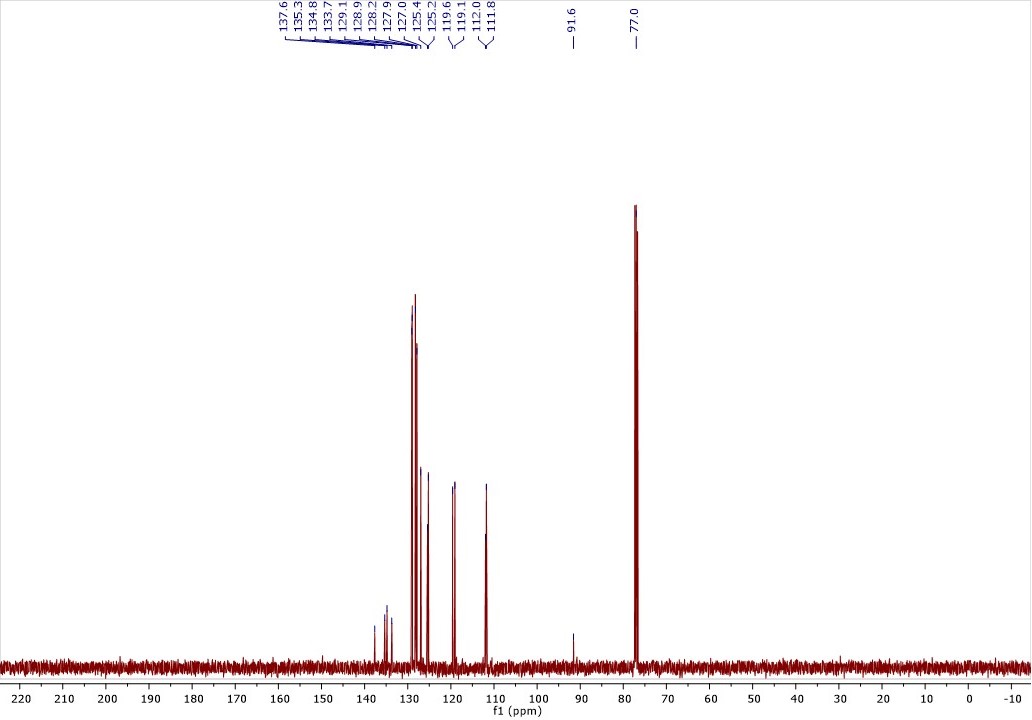

Supplement: Supplemental Information 1 [file peerj-12-17074-s001.docx]
