# Supplementary material for: Exploring the antioxidant potential of chalcogen-indolizines throughout in vitro assays
Source: PeerJ. 2024 Mar 15;12:e17074. doi: 10.7717/peerj.17074 (PMC10946399; doi:10.7717/peerj.17074)
Supplement: Supplemental Information 3 [file peerj-12-17074-s003.xlsx]

## Sheet: Selenoindolizines
	FRAP data													Positive control:
	Compound													Ascorbic acid (AA)
	ClSeI			MeSeI			SeI			AA				Trolox (Trlx)
	Experiment 1	Experiment 2	Experiment 3	Experiment 1	Experiment 2	Experiment 3	Experiment 1	Experiment 2	Experiment 3	Experiment 1	Experiment 2	Experiment 3
Control group	0.035	0.008	0	0	0	0	0	0	0	0.002	0.027	0.006
Vehicle group	0.023	0.009	0	0	0	0	0.002	0	0	0	0	0
1 μM	0.166	0.066	0.06	0.071	0.067	0.053	0.059	0.051	0	0.045	0.057	0.049
5 μM	0.285	0.286	0.247	0.589	0.24	0.255	0.225	0.214	0.159	0.248	0.241	0.25
10 μM	0.564	0.472	0.478	0.454	0.441	0.462	0.49	0.425	0.341	0.564	0.567	0.572
15 μM	0.778	0.675	0.705	0.642	0.573	0.604	0.729	0.546	0.495	0.84	0.728	0.879
25 μM	1.244	1.063	1.049	0.988	0.794	0.858	1.058	0.874	0.818	1.184	1.223	1.225
	Protein carbonylation data
	Compound
	ClSeI			MeSeI			SeI			Trlx
	Experiment 1	Experiment 2	Experiment 3	Experiment 1	Experiment 2	Experiment 3	Experiment 1	Experiment 2	Experiment 3	Experiment 1	Experiment 2	Experiment 3
Control group	6.84	6.12	5.58	8.6	7.13	6.71	6.68	7.27	8.13	8.9875	8.8875	10.85
Induced group	16.08	17.94	19.93	20.65	20.59	18.36	16.29	14.51	11.75	14.7625	18.4875	15.7625
1 μM	13.95	17.85	17.2	17.69	17.52	19.95	12.8	13.43	12.1	12.95	11.25	12.1875
10 μM	13.09	13.44	14.51	15.54	15.79	17.03	10.1	4.42	8.13	10	13.8712	13.0625
25 μM	5.49	4.32	4.48	6.54	5.89	3.65	7.36	4.74	5.63	10.7625	13.9875	7.675
50 μM	3.04	3.99	3.83	4.56	2.8	3.13	7.17	4.58	4.06	13.7875	7.8	9
100 μM	4.53	2.29	3.32	3.22	3.62	2.64	6.29	4.13	2.55	9.1	9.2375	9.2
	DPPH data
	Compound
	ClSeI			MeSeI			SeI			AA
	Experiment 1	Experiment 2	Experiment 3	Experiment 1	Experiment 2	Experiment 3	Experiment 1	Experiment 2	Experiment 3	Experiment 1	Experiment 2	Experiment 3
Vehicle group	104.73	102.11	101.48	104.73	102.11	101.48	104.73	102.11	101.48	100	100	100
10 μM	98.1	92.78	105.2	99.62	80.73	103.33	99.92	96.86	102.46	62.5	59.11	59.96
25 μM	98.7	86.72	103.82	95.07	85.52	99.71	96.28	96.91	101.58	5.92	5.3	4.93
100 μM	100.57	94.6	87.07	91.83	82.03	85.59	93.84	85.32	84.64	3.07	3.17	3.45
300 μM	78.51	87.51	75.61	77.36	69.79	69.53	78.51	76.03	73.87	3.07	2.33	1.93
500 μM	78.22	82.62	69.97	70.92	60.08	65.45	78.22	68.19	66.58	0.66	1.27	0.43
	TBARS data
	Compound
	ClSeI			MeSeI			SeI			Trlx
	Experiment 1	Experiment 2	Experiment 3	Experiment 1	Experiment 2	Experiment 3	Experiment 1	Experiment 2	Experiment 3	Experiment 1	Experiment 2	Experiment 3
Control group	440.19	510.72	533.82	459.65	756.35	504.64	391.55	716.22	631.1	503.4	382.95	463.2
Induced group	1067.64	1038.46	1059.13	928.42	1047.58	983.14	1036.03	1117.5	1067.04	1014	977.55	1057.8
Vehicle group	963.68	964.28	991.04	834.78	968.54	919.3	975.23	1036.03	993.47	1068.75	1001.25	1017.75
1 μM	902.88	956.99	960.64	816.54	749.05	897.41	977.66	1021.44	919.29	966.6	997.65	986.7
2 μM	858.5	792.83	967.93	809.85	738.72	938.75	964.9	1029.95	994.08	967.2	1001.25	935.7
3 μM	839.65	912	959.42	808.64	822.02	877.95	858.77	992.25	869.44	984.9	973.95	973.95
4 μM	809.86	905.92	933.88	804.384	820.19	823.23	745.41	971.58	904.7	966.6	988.5	986.7
5 μM	816.54	905.92	955.77	773.37	847.55	749.06	834.78	956.99	950.3	944.7	970.35	966.6
10 μM	88.77	890.11	627.45	78.43	88.77	78.43	55.94	214	153.21	873.6	864.45	828
100 µM										505.2	521.55	477.75

## Sheet: Thioindolizines
	FRAP data																					Positive control:
	Compound																					Ascorbic acid (AA)
	SIN-1				SIN-2			SIN-3			SIN-4				SIN-5			AA				Trolox (Trlx)
	Experiment 1	Experiment 2		Experiment 3	Experiment 1	Experiment 2	Experiment 3	Experiment 1	Experiment 2	Experiment 3	Experiment 1	Experiment 2	Experiment 3		Experiment 1	Experiment 2	Experiment 3	Experiment 1	Experiment 2	Experiment 3
Control group	0.084	0.123		0.032	0.025	0.01	0.001	0.015	0.001	0.003	0.013	0.02	0.002		0.006	0.09	0.026	0.002	0.027	0.006		Std. Error of Mean (SEM)
Vehicle group	0.086	0.105		0.035	0.027	0.007	0.006	0.006	0.008	0.01	0.007	0.022	0.01		0	0.086	0.035	0	0	0
1 μM	0.049	0.063		0.014	0.005	0.028	0.054	0.049	0.063	0.055	0.055	0.057	0.046		0.039	0.05	0.074	0.045	0.057	0.049
5 μM	0.093	0.095		0.18	0.141	0.159	0.218	0.224	0.287	0.218	0.228	0.205	0.189		0.181	0.081	0.208	0.248	0.241	0.25
10 μM	0.247	0.279		0.355	0.303	0.314	0.387	0.368	0.514	0.389	0.399	0.348	0.331		0.364	0.231	0.344	0.564	0.567	0.572
15 μM	0.365	0.436		0.511	0.457	0.462	0.503	0.54	0.66	0.525	0.52	0.481	0.478		0.519	0.375	0.452	0.84	0.728	0.879
25 μM	0.597	0.701		0.78	0.582	0.602	0.746	0.801	0.946	0.779	0.795	0.664	0.684		0.805	0.579	0.632	1.184	1.223	1.225
	Protein carbonylation data
	Compound
	SIN-1				SIN-2			SIN-3			SIN-4				SIN-5			Trlx
	Experiment 1	Experiment 2		Experiment 3	Experiment 1	Experiment 2	Experiment 3	Experiment 1	Experiment 2	Experiment 3	Experiment 1	Experiment 2	Experiment 3		Experiment 1	Experiment 2	Experiment 3	Experiment 1	Experiment 2	Experiment 3
Control group	7.15	8.76		6.82	7.17	6.71	6.94	9.49	9.91	9.67	7.33	8.6	7.71		8.02	8.22	8.27	8.9875	8.8875	10.85
Induced group	20.89	17.9		13.86	18.58	15.79	15.98	23.04	20.49	19.09	17.22	15.25	13.65		15.63	17.01	16.33	14.7625	18.4875	15.7625
1 μM	20.84	17.97		14.14	17.52	15.45	18.12	20	18.39	20.82	16.78	16.29	15.05		15.75	15.45	15.65	12.95	11.25	12.1875
10 μM	6.91	8.43		6.1	12.52	12.43	14.17	13.15	11.78	6.94	13.76	13.65	12.15		5.96	6.57	12.43	10	13.8712	13.0625
25 μM	6.1	4.23		4.37	3.85	3.92	11.2	5.59	7.25	4.95	6.94	5.14	5.07		5.56	6.12	6.57	10.7625	13.9875	7.675
50 μM	5.53	3.86		4.11	4.16	4.69	4.68	5.16	5.68	4.3	5.59	2.5	4.41		6.5	4.69	4.32	13.7875	7.8	9
100 μM	3.2	3.43		2.24	3.13	3.08	4.69	2.57	5.51	2.99	5.87	2.74	3.58		3.69	5.58	3.62	9.1	9.2375	9.2
	DPPH data
	Compound
	SIN-1				SIN-2			SIN-3			SIN-4				SIN-5			AA
	Experiment 1	Experiment 2		Experiment 3	Experiment 1	Experiment 2	Experiment 3	Experiment 1	Experiment 2	Experiment 3	Experiment 1	Experiment 2	Experiment 3		Experiment 1	Experiment 2	Experiment 3	Experiment 1	Experiment 2	Experiment 3
Vehicle group	102.2	100.34		100.35	102.2	100.34	100.35	101.11	100.91	101.61	103.53	101.95	101.63		101.34	100.96	103.53	100	100	100
10 μM	102.38	99.63		103.64	101.5	100.6	104.62	102.24	100.64	104.25	103	102.57	106.75		103.58	102.63	106.59	62.5	59.11	59.96
25 μM	101.59	100.53		103.94	101.19	101.02	105.38	102.14	101.06	104.1	103.81	102.5	106.07		102.98	89.31	105.43	5.92	5.3	4.93
100 μM	98.5	97.16		96.65	103.5	95.45	97.92	99.63	98.86	100.23	102.52	100	99.18		97.42	99.9	99.33	3.07	3.17	3.45
300 μM	96.3	93.07		92.6	101.6	95.34	96.76	94.69	93.72	96.55	99.83	97.51	97.28		94.32	98.46	94.54	3.07	2.33	1.93
500 μM	94.5	89.66		90.87	100.2	94.09	95.84	90.25	91.89	93.33	96.89	93.06	93.82		96.28	97.02	89.17	0.66	1.27	0.43
	TBARS data
	Compound
	SIN-1				SIN-2			SIN-3			SIN-4				SIN-5
	Experiment 1	Experiment 2	Experiment 3	Experiment 4	Experiment 1	Experiment 2	Experiment 3	Experiment 1	Experiment 2	Experiment 3	Experiment 1	Experiment 2	Experiment 3	Experiment 4	Experiment 1	Experiment 2	Experiment 3	Experiment 4	Experiment 5
Control group	372	255.36	439.15	356.73	389.89	389.16	389.75	449.92	451.13	407.36	449.92	451.13	407.36		456	366	413.44	419.52
Induced group	930.24	814.72	794.42	975.99	847.77	571.6	1165.96	1082.24	1020.22	1096.83	1082.24	1020.22	1096.83		1186.81	995.9	938.75	1020.22
Vehicle group	835.39	770.94	739.26	864.81	802.09	567.23	1042.41	1008.06	963.07	1039.68	1008.06	963.07	1039.68		1068.86	924.16	1027.52	974.01
1 μM	829.31	659.07	727	878.71	770.11	559.13	1033.14	989.82	961.85	967.93	975.232	910.78	857.28		1100.48	875.52	819.58	931
2 μM	815.93	644.48	720.11	833.93	775.58	571.57	966.72	956.99	929.02	931.45	956.99	922.94	871.87		1059.13	888.89	857.28	935
3 μM	789.18	633.53	728.53		772.03	524.25	986.79	956.99	910.78	875.52	984.96	862.14	822		1059.13	856.06	790.4	901
4 μM	733.24	278.46	698.66	467.36	931.21	297.61	603.82	837.82	778.24	662.72	948.48	965.5	367.23		997.12	794.04	8.512	35.26	458
5 μM	46.2	55.93	123.33	83.38	230.2	41.08	33.97	875.52	701.63	750.27	859.71	907.13	34.04	458	859.71	820.8	17.024	26.75	431
10 μM	38.35	43.77	32.93		23.27	19.72	15.53	15.87	13.48	23.1	19.85	11.99	23.1		30.4	13.37	3.648
Trlx (200 μM)	14	13.8	15.75		12.5	12.2	14	11.46	11.23	12.8	11.57	11.34	12.96		12	11.8	13.5
